# Supplementary material
Source: publisher site journal article supplement (https://www.dovepress.com/article/311223)
Supplement: Supplementary file 1 [file get_supplementary_file.php]

**Supplementary Table S1: In-depth interview question guides**

| **Participants** | **Questions** |
| --- | --- |
| **Cocoa farmers** | Could you please explain your sources of pesticide safety information? |
| **Pesticide retailers** | Could you please describe the advice you give to farmers on safe pesticide use? |
| How often do you advice the farmers on safety measures when buying your pesticide products? |
| Could you please explain the meaning of these safety pictograms on the labels exactly the way you advice farmers? |
| **Extension officers** | Could you please describe the specific type of training you deliver to farmers during your visits? |
| How often do you train cocoa farmers specifically on pesticides safety? |
| What are the challenges you encounter during trainings on pesticide use and disposal? |
| **Pesticide importers** | What are the training programs from your organization that are available for cocoa farmers on safe pesticide use? |
| Could you please describe the nature of the assistance render to farmers on pesticide safety? |
| What are the challenges facing your organization in order to ensure safe pesticide use among cocoa farmers? |
| Could you please explain any opportunities for training and capacity building for cocoa farmers on pesticide use and handling? |
| **Government agencies** | What are the pesticide workshops or seminars organized by your agency for farmers? |
| Could you explain if there are government programs on the management of pesticide wastes among farmers? |
| What are the challenges facing your agency in order to ensure safe pesticide use among farmers? |
| Could you describe if there is any environmental policy specifically designed for farmers’ pesticide safety? |
| What are the challenges affecting the implementation of currently available policies or regulations on pesticide safety? |
| Could you please provide some recommendations for policy reform safe in pesticide use? |
